# Supplementary material for: A Nutrigenetic Approach to Investigate the Relationship between Metabolic Traits and Vitamin D Status in an Asian Indian Population
Source: PubMed Central journal article supplement (PMC7285077; doi:10.3390/nu12051357), 2020-05-09
Supplement: nutrients-12-01357-s001.pdf [file nutrients-12-01357-s001.pdf]

**Table S1: Genotypic and allelic frequencies of the Single Nucleotide Polymorphisms that were used to create the genetic risk score**

|               | <b>Single Nucleotide Polymorphisms</b> | <b>Nucleotide Change</b> | <b>Homozygous Common</b> | <b>Heterozygote</b> | <b>Homozygous Rare</b> | <b>HWE P value</b> | <b>Minor Allele Frequency</b> |
|---------------|----------------------------------------|--------------------------|--------------------------|---------------------|------------------------|--------------------|-------------------------------|
| <i>FTO</i>    | rs8050136                              | A/C                      | CC: 290<br>(75.1%)       | CA: 90<br>(23.3%)   | AA: 6<br>(1.6%)        | 0.74               | A= 0.13                       |
|               | rs2388405                              | C/T                      | TT: 340<br>(83.5%)       | CT: 62<br>(15.2%)   | CC: 5<br>(1.2%)        | 0.26               | C= 0.09                       |
| <i>TCF7L2</i> | rs12255372                             | G/T                      | TT: 163<br>(64.4%)       | TG: 75<br>(29.6%)   | GG: 15<br>(5.9%)       | 0.12               | T= 0.21                       |
|               | rs7903146                              | C/T                      | TT: 131<br>(51.8%)       | TC: 98<br>(38.7%)   | CC: 24<br>(9.5%)       | 0.37               | T= 0.29                       |
| <i>MC4R</i>   | rs17782313                             | C/T                      | TT: 144<br>(57.1%)       | TC: 93<br>(36.9%)   | CC: 15<br>(6.0%)       | 1.00               | C= 0.24                       |

HWE: Hardy Weinberg Equilibrium

**Table S2: Association between genetic risk score (GRS) and Metabolic Traits**

|                                    | GRS ≤ 1 |              | GRS > 1 |              | P value* |
|------------------------------------|---------|--------------|---------|--------------|----------|
|                                    | N       | Mean ± SD*** | N       | Mean ± SD*** |          |
| <b>BMI*</b>                        | 404     | 1.42 ± 0.08  | 141     | 1.43 ± 0.08  | 0.19     |
| <b>WC</b>                          | 403     | 1.94 ± 0.05  | 140     | 1.95 ± 0.06  | 0.53     |
| <b>25(OH)D**</b>                   | 402     | 1.21 ± 0.25  | 141     | 1.19 ± 0.26  | 0.34     |
| <b>Fasting plasma glucose</b>      | 380     | 2.04 ± 0.14  | 136     | 2.04 ± 0.13  | 0.32     |
| <b>HbA1c</b>                       | 403     | 0.80 ± 0.09  | 141     | 0.81 ± 0.108 | 0.96     |
| <b>SBP</b>                         | 403     | 2.10 ± 0.06  | 141     | 2.11 ± 0.07  | 0.23     |
| <b>DBP</b>                         | 403     | 1.90 ± 0.06  | 141     | 1.90 ± 0.06  | 0.37     |
| <b>Fasting total cholesterol</b>   | 403     | 2.30 ± 0.09  | 141     | 2.24 ± 0.09  | 0.58     |
| <b>Fasting LDL-c</b>               | 403     | 2.04 ± 0.15  | 141     | 2.02 ± 0.19  | 0.68     |
| <b>Fasting HDL-c</b>               | 403     | 1.60 ± 0.09  | 141     | 1.60 ± 0.09  | 0.72     |
| <b>Fasting serum triglycerides</b> | 403     | 2.10 ± 0.22  | 141     | 2.10 ± 0.20  | 0.74     |

BMI: body mass index, WC: waist circumference, HbA1c: glycated Haemoglobin, SBP: systolic blood pressure, DBP diastolic blood pressure, LDL-c: low density lipoprotein, HDL-c: high density lipoprotein.

5 Single nucleotide polymorphisms: (*FTO* rs8050136 & rs2388405 + *TCF7L2* rs12255372 & rs7903146 + *MC4R* rs17782313)

All associations were adjusted for age, gender, type 2 diabetes and BMI

\* Adjusted for age, gender and type 2 diabetes

\*\* Adjusted for age, gender, type 2 diabetes, BMI and months of sample collection

\*\*\* log transformed values
